# Supplementary material for: ROS and cGMP signaling modulate persistent escape from hypoxia in Caenorhabditis elegans
Source: PLoS Biol. 2022 Jun 21;20(6):e3001684. doi: 10.1371/journal.pbio.3001684 (PMC9249223; doi:10.1371/journal.pbio.3001684)
Supplement: S1 Data — (XLSX) [file pbio.3001684.s013.xlsx]

## Sheet: Fig 2F
Total cGMP concentration (pmol/mg protein)
Fig 2F: Total cGMP levels in animal lysates determined by a cGMP enzyme immunoassay
	WT	bbs-9(gk471)	dyf-3(m185)	pde-1(nj57); pde-2(tm3098); pde-3(nj59); pde-5(nj49)
1	5.6038	8.19983	7.09392	23.1103
2	5.25723	6.99023	7.62215	25.2306
3	4.23823	7.81647	8.06004	25.0301

## Sheet: Fig 3D
Total cGMP concentration (pmol/mg protein)
Fig 3D: Total cGMP levels in animal lysates determined by a cGMP enzyme immunoassay
	WT	bbs-9(gk471)	gcy-28(yum32)	bbs-9(gk471) gcy-28(yum32)
1	5.33736	6.44704	2.02333	3.16844
2	4.96142	6.02429	2.10957	2.92995
3	5.09255	6.31389	2.15405	3.0708

## Sheet: Fig 3F
Relative fluoresent intensity
Fig 3F: Quantitation of FlincG3 fluorescent signal intensity in ASK neurons normalized to mCherry fluorescence intensity
	WT	bbs-9(gk471)
1	0.283213	1.13819
2	0.531071	1.00773
3	0.331286	2.33334
4	4.80817	1.08626
5	0	0
6	0.766583	0.411744
7	0.915768	1.89647
8	0.609591	0.573798
9	0.892437	6.03301
10	1.9226	4.43886
11	0.650215	12.1276
12	0	1.20981
13	1.02969	7.12942
14	0.36405	9.94245
15	0	0
16	1.21373	4.46223
17	0.419779	2.89713
18	1.25758	0
19	1.57674	1.6655
20	0	0.412025
21	3.90783	2.49377
22	1.16744	0.851119
23	0.502326	0.292323
24	1.0753	0
25	1.13691	1.99794
26	0	1.66273
27	1.02449	3.21817
28		1.21991

## Sheet: Fig 5F
Total cGMP concentration (pmol/mg protein)
Fig 5F: Total cGMP levels in animal lysates determined by a cGMP enzyme immunoassay
	WT	gpa-3(pk35) odr-3(n1605)
1	5.82218	14.1826
2	6.31272	12.0381
3	4.01268	11.0262
4	4.75726	14.7654

## Sheet: Fig 5I
Relative fluoresent intensity
Fig 5I: Quantitation of ODR-3-GFP in the cilia and neuronal cell bodies of ADL and ASH neurons
Cilia	WT	bbs-9(gk471)		Cell body	WT	bbs-9(gk471)
1	1.6672	0.353944		1	0.257599	0
2	0.353661	0.065449		2	2.0327	0.350711
3	0.641489	1.60579		3	0.358705	1.33136
4	0.830802	0.266531		4	0.0296803	0.292015
5	0.148265	0.0629515		5	0.811949	0.880103
6	0.601483	2.12225		6	0	0
7	1.25988	0.00687619		7	1.38628	1.15761
8	0.0103367	0.295477		8	0.563051	0.160491
9	2.56893	0.12649		9	0.037557	0.172321
10	0.446978	0.333081		10	5.56141	0.119831
11	2.34864	0.00815704		11	0.551082	0.251125
12	0.881359	0.241922		12	2.17037	0.606666
13	0.151709	0.280909		13	0.465297	0.878916
14	3.60119	0.293541		14	2.73267	0.412483
15	0.243668	0.303422		15	0.727406	0
16	0.00353762	0.255725		16	0.907906	0
17	0.259045	0.268906		17	0.085987	0.138104
18	1.70292	0.00707522		18	0.0159041	1.08977
19	1.80268	0.0821964		19	0.62595	0.192309
20	0.751065	1.60579		20	1.03147	0.0159122
21	0.725162	0.0979102		21	0.647031	0
22		0.0632757		22		0
23		0.0460852		23		0.743212
24		0.078463		24		0
25		0.397657		25		0.0201351
26		0.102221		26		2.98158
27		0.0110943		27		0.295446
28		0.45509		28		1.16358
29		0.226067		29		0.249455
30		0.730394		30		1.46504
31		0.463218		31		0
32		0.992302		32		0.486746
33		0.0697763		33		0.0460993
34		0.276139		34		0.00852648
35		0.104456		35		0.293892
36		0.0936022		36		0.211129

## Sheet: Fig 5J
Relative fluoresent intensity
Fig 5J: Quantitation of GPA-3-GFP in the cilia and neuronal cell bodies of ADL and ASH neurons
Cilia	WT	bbs-9(gk471)		Cell body	WT	bbs-9(gk471)
1	2.85939	0.970017		1	1.71517	0.48467
2	1.28197	0.44375		2	0.220198	1.06704
3	1.10264	0.833927		3	0.674989	0.88781
4	1.03712	1.00302		4	0.89677	0.664434
5	0.656074	0.47993		5	1.13635	0.590439
6	0.864243	0.201643		6	1.28724	0.873456
7	1.83425	0.0543199		7	1.28865	1.19887
8	0.292572	1.79124		8	0.460378	0.0383292
9	0.661687	0.36264		9	0.769372	1.50076
10	0.594099	0.134504		10	0.816186	1.38115
11	0.330053	0.629877		11	0.544534	0.962583
12	1.83029	0.929498		12	1.46232	1.08536
13	0.741266	0.205278		13	1.02061	1.58044
14	0.678609	1.40067		14	1.3204	0.462918
15	0.638707	0.437677		15	1.23197	0.65735
16	1.48735	0.604381		16	0.737841	0.668586
17	0.770342	0.669704		17	0.799458	0.534964
18	0.807756	0.219366		18	0.816392	0.382689
19	1.21405	0.333543		19	1.06035	0.0191864
20	0.693357	1.29518		20	0.914134	0.996105
21	0.159614	0.491567		21	0.875228	0.249955
22	1.16504	0.245898		22	0.73556	0.388545
23	1.39117	0.0290794		23	0.823526	0.14645
24	0.873831	0.225062		24	2.05565	0.711921
25	0.746916	0.612161		25	0.803803	0.788623
26	1.22788	0.0175442		26	1.17711	0.630785
27	1.05974	1.92895		27	1.35582	1.20145
28		0.119555		28		0.58808
29		0.035658		29		0.82353
30		0.485607		30		0.854573
31		0.0805036		31		1.01761

## Sheet: Fig 5K
Relative fluoresent intensity
Fig 5K: Quantitation of ODR-10-GFP expression in the cilia of AWA neurons
	WT	bbs-9(gk471)
1	0.24549	3.45266
2	0.785533	2.90832
3	1.44581	1.51723
4	0.788816	4.46247
5	1.50969	2.5689
6	0	7.47993
7	0.526525	3.35505
8	1.8423	4.17125
9	0.436472	1.36519
10	0.09561	5.03747
11	1.39123	3.80363
12	1.65593	5.31245
13	0.658073	4.56138
14	2.04113	4.93289
15	0.622561	3.56231
16	0.516372	4.26956
17	3.67557	0.582705
18	0.19283	0.0272279
19	0.955166	2.58847
20	0.060784	1.63683
21	2.26605	5.75523
22	0.556449	3.3843
23	1.08416	5.34154
24	1.88154	4.34734
25	0.47658	6.95581
26	0.646199	7.79554
27	1.01312	4.78181
28	0.120156	3.06951
29	0.758024	2.81423
30	0.858631	7.31771
31	2.57214	2.10416
32	0.1871	3.06771
33	1.01625	3.14867
34	1.33066	1.59496
35	2.33801	2.91286
36	0.742611	3.98523
37	3.49073	5.24491
38	0.190672	5.61981
39	0.115318	5.61981
40	2.37599	2.56619
41	1.72055	1.83591
42	0.422087	3.45363
43	0.786581	2.35701
44	2.26211	0.695913
45	0.362753	1.53826
46	0.719269	3.07308
47	0.632795	3.94707
48	0.695965	4.51731
49	0.455903	5.44807
50	1.12946	3.52577
51	1.27515	6.89825
52	0.274696
53	0.620511
54	0.550471
55	0.910983
56	0.62052
57	0.788762
58	0.858065
59	0.447073

## Sheet: Fig 6D
Relative fluoresent intensity
Fig 6D: Quantification of DAF-28-mCherry fluorescent intensity in one of the posterior coelomocytes
	WT	bbs-9(gk471)	gcy-28(yum32)	bbs-9(gk471) gcy-28(yum32)
1	1.52504	2.91155	1.08772	1.20872
2	1.87238	2.09191	1.51253	1.22955
3	1.20256	2.61311	1.51771	1.86607
4	0.45036	2.64539	1.20947	1.94567
5	0.534628	2.48378	1.47135	1.41557
6	1.08648	2.46604	0.725509	1.26678
7	0.574773	2.60514	0.728944	1.4832
8	0.192995	2.48457	1.30193	2.07133
9	1.15233	1.48688	1.13671	1.49603
10	1.21367	2.21487	1.26337	2.11471
11	1.01071	2.59687	1.24954	1.01659
12	0.200613	1.7963	1.01084	0.443738
13	1.44805	2.25288	1.54419	1.52124
14	0.276582	2.04248	0.439946	1.05985
15	1.69162	2.63871	0.196954	1.95868
16	1.04948	2.09716	0.329116	1.86154
17	0.733711	2.44527	1.91603	2.21501
18	1.15999	3.00002	1.4936	1.81346
19	0.936721	2.27385	1.19938	1.37779
20	1.68731	1.8908	1.46348	1.73858
21	1.7339	2.35446	0.866861	1.30615
22	1.47205	2.39788	1.15521	1.32334
23	1.41121	2.14646	1.4786	1.72909
24	0.507858	2.47536	1.14718	1.56183
25	0.811472	2.05675	1.49547	1.36097
26	0.865077	2.90205	0.606121	1.10337
27	0.704476	2.66154	1.0176	1.43266
28	0.38599	2.09462	1.16356	1.83127
29	1.25901	2.16943	0.940491	1.4672
30	1.16691	2.38917	1.01891	1.80539
31	0.816147	4.38471	1.06356	1.36446
32	0.30863	1.73582	0.834604	1.16684
33	1.22427	2.43324	1.27702	1.80043
34	0.961768	2.09388	0.431368	1.66008
35	1.31538	2.43484	0.221297	1.95287
36	1.13205	2.7306	0.282635	1.57741
37	0.662332		1.80803	2.26119
38	0.969267		1.14337	1.57016
39	0.77162		0.964448	1.24922
40	1.52059		1.12894	1.86386

## Sheet: Fig 6F
Relative fluoresent intensity
Fig 6F: Quantification of FLP-21-mCherry fluorescent intensity in one of the posterior coelomocytes
	WT	bbs-9(gk471)	gcy-28(yum32)	bbs-9(gk471) gcy-28(yum32)
1	0	0	3.80152	5.82083
2	1.15923	4.47792	0.751235	0.0298003
3	0.0332912	4.5393	1.97856	1.87515
4	2.65906	7.93589	0	4.72542
5	0	11.469	0.566045	3.02893
6	3.89334	5.67908	0	0.568956
7	0	6.40753	2.0692	4.59472
8	0.955349	1.52166	4.14934	0.545113
9	4.26984	3.63493	0	1.98271
10	0.388469	6.83808	6.29466	0.0207295
11	0	6.03321	0.665878	7.16533
12	2.04443	7.63747	1.7519	2.5157
13	2.20866	5.29205	2.63486	6.66952
14	2.24019	15.4638	4.24074	1.76539
15	1.05811	0.703779	0	3.99422
16	0	5.80418	0	4.00484
17	0	9.05571	2.65465	0
18	1.42788	5.13814	6.03508	0
19	0.421086	17.3717	1.93633	11.6663
20	0	1.89363	3.0555	0.980776
21	1.95497	10.8066	5.68468	9.56134
22	1.01383	3.00893	0	8.80622
23	0	4.86017	4.75043	0
24	0	6.63299	7.51601	0.734495
25	0	4.98371	1.87661	9.65569
26	1.27837	5.09847	2.67915	3.78209
27	0.17085	4.86514	1.06867	3.1144
28	0.28063	9.50712		0
29	0	4.75978
30	2.5424	1.06809

## Sheet: Fig S5F
Relative fluoresent intensity
Fig S5F: Quantification of FlincG3 fluorescent intensity in AFD neurons
	WT	bbs-9(gk471)
1	0.628211	1.82325
2	0.568805	0.843173
3	0.16397	2.24694
4	0.204752	1.68426
5	1.04259	3.86648
6	0.452666	1.30587
7	0.919161	2.52611
8	0.440492	1.68708
9	0.798267	1.63762
10	0.190014	1.47903
11	0.934919	1.5016
12	2.11169	2.4068
13	1.51814	1.14363
14	0	2.71676
15	1.03676	2.01137
16	1.00594	1.10709
17	0.793784	1.44265
18	0.664626	1.6678
19	0.278884	0.979591
20	1.03233	0
21	0	1.92814
22	0.0639631	1.69115
23	1.60259	1.1585
24	0	1.31983
25	1.02983	1.38017
26	0.723226	1.73621
27	1.12883	2.89834
28	0.941559	1.593
29		1.16706
30		1.78003
31		1.45064
32		0.765444
33		0.32755
34		0.586546
35		0.564324

[truncated: 8 more sheets: Fig S5H, Fig S8A, Fig S8B, Fig S8E, Fig S9G, Fig S10A, Fig S10B, Fig S10C]
